# Supplementary material for: Ayapana triplinervis Essential Oil and Its Main Component Thymohydroquinone Dimethyl Ether Inhibit Zika Virus at Doses Devoid of Toxicity in Zebrafish
Source: PubMed Central journal article supplement (PMC6804133; doi:10.3390/molecules24193447), 2019-09-23
Supplement: molecules-24-03447-s001.pdf [file molecules-24-03447-s001.pdf]

**Table S1.** Chemical composition of *Ayapana triplinervis* essential oil (aerial part) from Reunion Island

| No | Compounds                                         | KI <sup>a</sup> | Identification | Composition (%) |
|----|---------------------------------------------------|-----------------|----------------|-----------------|
| 1  | Tricyclene                                        | 923             | KI, MS         | < 0.01          |
| 2  | $\alpha$ -Thujene                                 | 931             | KI, MS         | 0.99            |
| 3  | $\beta$ -Pinene                                   | 976             | KI, MS         | 1.82            |
| 4  | Myrcene                                           | 985             | KI, MS         | 0.06            |
| 5  | $\alpha$ -Phellandrene                            | 1006            | KI, MS         | 2.03            |
| 6  | <i>p</i> -Cymene                                  | 1022            | KI, MS         | 0.68            |
| 7  | Limonene                                          | 1026            | KI, MS         | 0.22            |
| 8  | $\beta$ -Phellandrene                             | 1028            | KI, MS         | < 0.01          |
| 9  | ( <i>Z</i> )- $\beta$ -Ocimene                    | 1041            | KI, MS         | 0.02            |
| 10 | ( <i>E</i> )-4,8-dimethyl-1,3,7-nonatriene        | 1110            | KI, MS         | 0.15            |
| 11 | Thymol methyl ether *isomer                       | 1225            | KI, MS         | 1.46            |
| 12 | Thymol methyl ether                               | 1234            | KI, MS         | 0.36            |
| 13 | Carvacrol methyl ether                            | 1245            | KI, MS         | < 0.01          |
| 14 | ( <i>E</i> )-Sabinyl acetate                      | 1291            | KI, MS         | 0.07            |
| 15 | Neryl acetate                                     | 1364            | KI, MS         | 0.04            |
| 16 | Linalool isobutyrate                              | 1379            | KI, MS         | < 0.01          |
| 17 | $\beta$ -Elemene                                  | 1384            | KI, MS         | 0.09            |
| 18 | Cyperene                                          | 1397            | KI, MS         | 0.08            |
| 19 | <b>Thymohydroquinone dimethyl ether</b>           | <b>1420</b>     | <b>KI, MS</b>  | <b>87.06</b>    |
| 20 | 1,4-Dimethoxy-2-methyl-5-(prop-1-en-2-yl) benzene | 1432            | KI, MS         | 0.04            |
| 21 | $\alpha$ -Humulene                                | 1452            | KI, MS         | 0.03            |
| 22 | Drima-7,9(11)-diene                               | 1465            | KI, MS         | < 0.01          |
| 23 | $\beta$ -Chamigrene                               | 1468            | KI, MS         | 0.07            |
| 24 | $\beta$ -Selinene                                 | 1483            | KI, MS         | 1.87            |
| 25 | Bicyclogermacrene                                 | 1489            | KI, MS         | < 0.01          |
| 26 | $\alpha$ -Muuroolene                              | 1500            | KI, MS         | 0.20            |
| 27 | $\delta$ -Amorphene                               | 1511            | KI, MS         | 0.03            |
| 28 | $\beta$ -Sesquiphellandrene                       | 1518            | KI, MS         | < 0.01          |
| 29 | Elemol                                            | 1541            | KI, MS         | 0.03            |
| 30 | Tert-Butyl 2-(4-methoxyphenyl) acetate            | 1550            | KI, MS         | < 0.01          |
| 31 | ( <i>E</i> )-Nerolidol                            | 1555            | KI, MS         | 0.03            |
| 32 | Caryophyllene oxide                               | 1573            | KI, MS         | 0.07            |
| 33 | 5-Cedranone *isomer                               | 1609            | KI, MS         | 0.74            |
| 34 | 5-Cedranone                                       | 1612            | KI, MS         | 0.20            |
| 35 | $\alpha$ -Eudesmol                                | 1649            | KI, MS         | 0.08            |
| 36 | Ar Turmerone                                      | 1656            | KI, MS         | 0.32            |
| 37 | Ar-Turmerone *isomer                              | 1661            | KI, MS         | 0.23            |
| 38 | $\beta$ -Turmerone                                | 1693            | KI, MS         | 0.11            |

<sup>a</sup> Kováts retention indices calculated against C<sub>8</sub>–C<sub>23</sub> *n*-alkanes on nonpolar ZB-5MS column.

A.

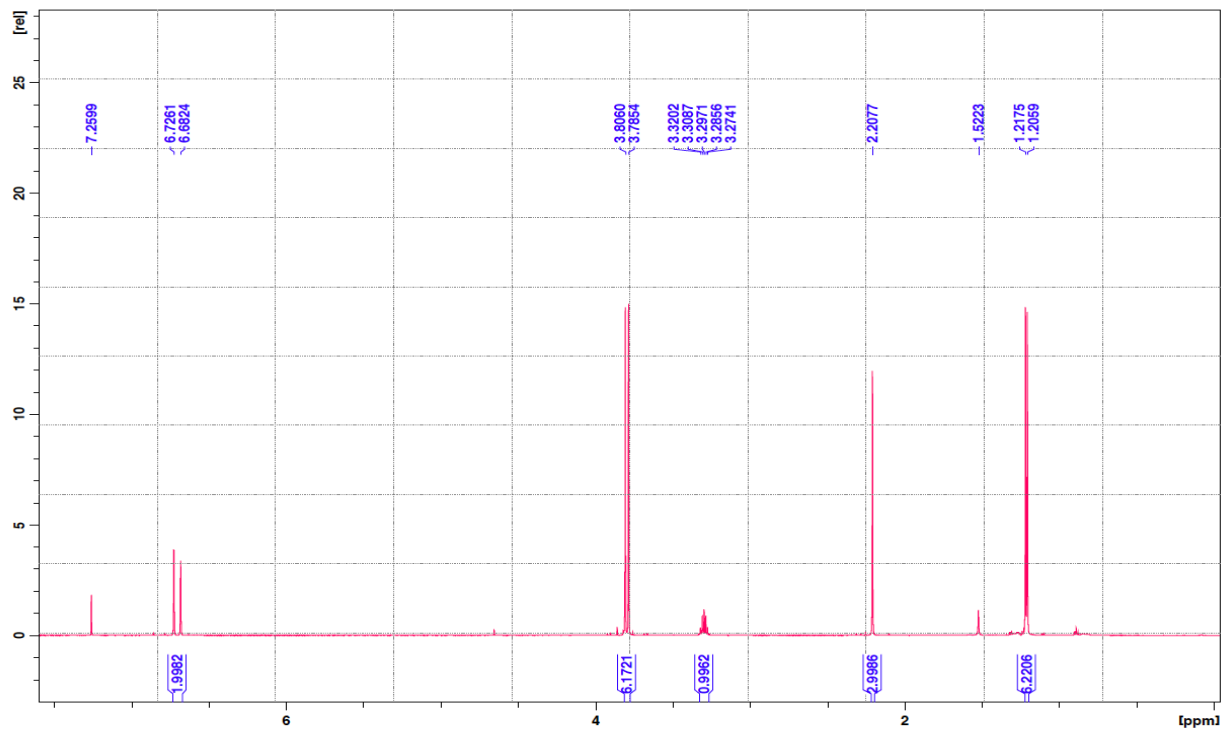

B.

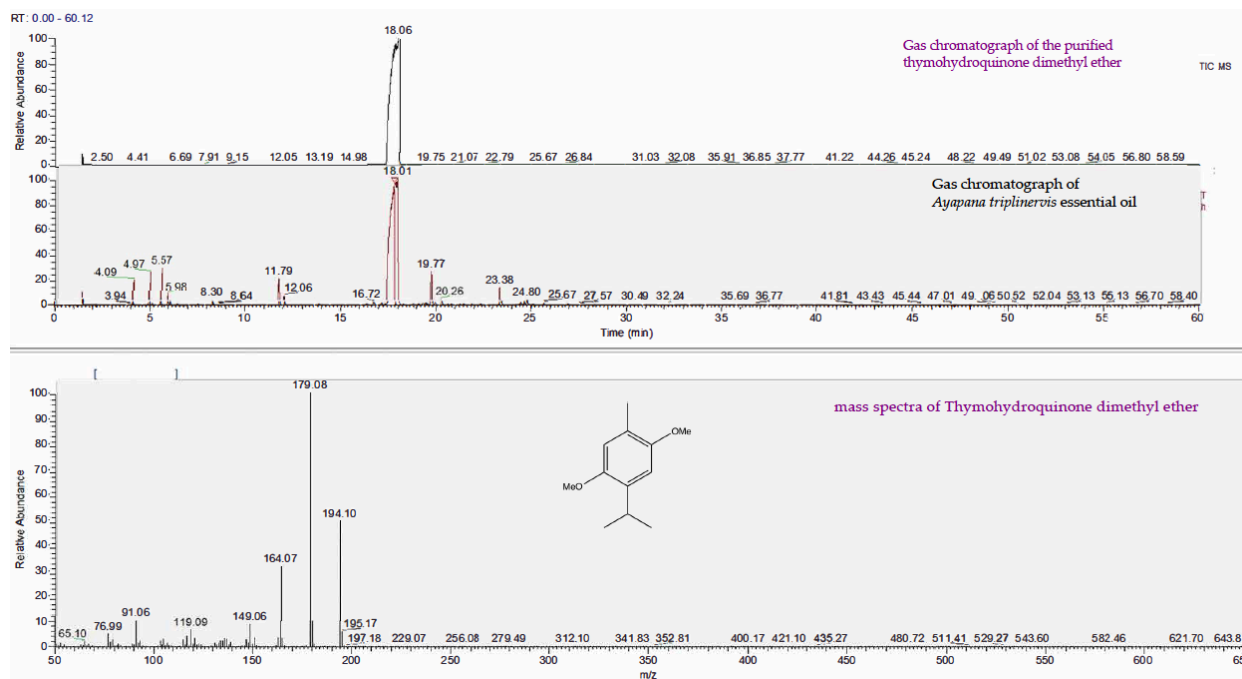

Figure S1. Characterisation of thymohydroquinone dimethyl ether after purification from *A. triplinervis* essential oil. (A). <sup>1</sup>H NMR spectra of purified thymohydroquinone dimethyl ether. (B). Gas chromatograph of purified thymohydroquinone dimethyl ether and *A. triplinervis* essential oil.
